# Supplementary material
Source: Elsevier journal article supplement (https://www.sciencedirect.com/science/article/pii/S0025775321003961)
Supplement: mmc1 [file S0025775321003961:mmc1.doc]

APÉNDICE A

Table A.1. Anticoagulation before admission in AF patients

| Variable-no. (%) | Prior AF (n=269) | Newly diagnosed AF (n=36) |
| --- | --- | --- |
| DOAC | 110 (40.9) | 0 |
| VKA | 109 (40.5) | 0 |
| LMWH | 15 (5.6) | 0 |
| No anticoagulation | 35 (13) | 36 (100) |

AF, atrial fibrillation; DOAC, direct oral anticoagulant; VKA, vitamin K antagonist; LMWH, low-molecular-weight heparin.

Table A.2. Anticoagulation during admission of AF and control group patients, before and after Propensity Score Matching.

|  |  | Before PSM | | | After PSM | | |
| --- | --- | --- | --- | --- | --- | --- | --- |
|  | Total  (n=610) | AF  (n=305) | No-AF (n=305) | **p** | AF  (n=151) | No-AF  (n=151) | **p** |
| Variable -no. (%) |  | | | | | | |
| LMWH | 555 (91) | 253 (83) | 302 (99) | <0.001 | 125 (82.8) | 149 (98.7) | <0.001 |
| Therapeutic dose | 200 (32.8) | 174 (57) | 26 (8.5) | <0.001 | 82 (54.3) | 18 (11.9) | <0.001 |
| Prophylactic dose | 355 (58.2) | 79 (26) | 276 (90.5) | <0.001 | 43 (28.5) | 131 (86.8) | <0.001 |
| DOAC | 23 (3.8) | 23 (7.5) | 0 | <0.001 | 12 (7.9) | 0 | 0.001 |
| VKA | 8 (1.3) | 8 (2.6) | 0 | 0.004 | 5 (3.3) | 0 | 0.06 |
| No anticoagulation | 24 (3.9) | 21 (6.9) | 3 (1) | <0.001 | 9 (6) | 2 (1.3) | 0.06 |

AF, atrial fibrillation; PSM, propensity score matching; LMWH, low-molecular-weight heparin; DOAC, direct oral anticoagulant; VKA, vitamin K antagonist

Table A.3. List of summarized major bleeding episodes.

|  | Total of major bleedings  (n=37) | AF (n=30) | No-AF (n=7) |
| --- | --- | --- | --- |
| Upper gastrointestinal bleeding | 4 (10.8) | 4 (13.3) | 0 |
| Lower gastrointestinal bleeding | 6 (16.2) | 6 (20) | 0 |
| Epistaxis | 2 (5.4) | 1 (3.3) | 1 (14.3) |
| Intracranial haemorrhage | 2 (5.4) | 2 (6.7) | 0 |
| Hematuria | 2 (5.4) | 2 (6.7) | 0 |
| Hemoptysis | 7 (18.9) | 6 (20) | 1 (14.3) |
| Other | 14 (37.9) | 9 (30) | 5 (71.4) |

AF, atrial fibrillation

Table A.4. Multivariate analysis. Independent predicting factors of major bleeding in AF patients.

| Variable | Odds ratio | 95% CI | | P |
| --- | --- | --- | --- | --- |
| Lower | Upper |
| D-dimer | 1.03 | 1.003 | 1.060 | 0.030 |
| Dyslipidemia | 2.76 | 1.18 | 6.45 | 0.019 |
| Obesity | 2.69 | 1.16 | 6.29 | 0.022 |

CI, confidence interval.

Table A.5. Baseline, clinical characteristics and endpoints during admission of AF patients depending on exitus during admission

| Variable | Total  (n=305) | No-exitus  (n=169) | Exitus  (n=136) | OR (95% CI) | P |
| --- | --- | --- | --- | --- | --- |
| **Baseline characteristics -no. (%)** | | | | | |
| Age, mean (SD)–yr | 79 (10.3) | 76.9 (10.8) | 81.6 (8.8) | 1.05 (1.02-1.08) | <0.001 |
| Male sex | 163 (53.4) | 79 (46.7) | 84(61.8) | 1.84 (1.17-2.91) | 0.009 |
| HBP | 244 (80) | 134(79.3) | 110 (80.9) |  | 0.73 |
| DM | 117 (38.4) | 60 (35.5) | 57 (41.9) |  | 0.253 |
| Dyslipidemia | 123 (40.3) | 63 (37.3) | 60 (44.1) |  | 0.226 |
| Obesity | 68 (22.3) | 42 (24.9) | 26 (19.1) |  | 0.232 |
| CKD | 73 (23.9) | 30 (17.8) | 43 (31.6) | 2.14 (1.26-3.67) | 0.005 |
| DBADLa | 133 (43.6) | 56 (33.1) | 77 (56.6) | 2.63 (1.65-4.20) | <0.001 |
| Alcoholism | 18 (5.9) | 12 (7.1) | 6 (4.4) |  | 0.332 |
| PVD | 54 (17.7) | 32 (18.9) | 22 (16.2) |  | 0.53 |
| Hepatopathy | 22 (7.2) | 14 (8.3) | 8 (5.9) |  | 0.42 |
| Recent strokeb | 5 (1.6) | 2 (1.2) | 3 (2.2) |  | 0.65 |
| Structural heart diseasec | 147 (48) | 76 (45) | 71 (52.2) |  | 0.221 |
| Mitral stenosisd | 3 (1) | 1 (0.6) | 2 (1.5) |  | 0.588 |
| Mechanical heart valve | 5 (1.6) | 1 (0.6) | 4 (2.9) |  | 0.108 |
| Prior major bleeding | 28 (9.2) | 12 (7.1) | 16 (11.8) |  | 0.161 |
| Prior stroke | 73 (23.9) | 40 (23.7) | 33 (24.3) |  | 0.903 |
| CHA2DS2-VASc (SD) | 4.4 (1.7) | 4.2 (1.7) | 4.5 (1.7) |  | 0.164 |
| Anticoagulant | 234 (76.7) | 136 (80.5) | 98 (72.1) |  | 0.084 |
| Antiplatelet | 38 (12.5) | 15 (8.9) | 23 (16.9) | 2.10 (1.04-4.18) | 0.035 |
| **Atrial fibrillation** | | | | | |
| Newly diagnosed | 36 (11.8) | 14 (8.3) | 22 (16.2) |  | 0.154 |
| Paroxysmal | 67 (22) | 41 (24.3) | 26 (19.1) |  |
| Persistent | 16 (5.2) | 8 (4.7) | 8 (5.9) |  |
| Permanent | 186 (61) | 106 (62.7) | 80 (58.8) |  |
| **Admission -no. (%)** | | | | | |
| Creatinine (SD)e | 1.06 (0.8-1.48) | 1.3 (1.4) | 1.5 (1.2) |  | 0.178 |
| D-dimer (SD)f | 4280 (10001) | 4205 (10266) | 4375 (9695) |  | 0.886 |
| Platelet count (SD)e | 210767 (91299) | 212704 (87394) | 208360 (96203) |  | 0.68 |
| ICU admission | 32 (10.5) | 15 (8.9) | 17 (12.5) |  | 0.305 |
| Hydroxychloroquine | 246 (80.7) | 146 (86.4) | 100 (73.5) |  | 0.005 |
| Azithromycin | 217 (71.1) | 128 (75.7) | 89 (65.4) | 0.61 (0.37-0.99) | 0.048 |
| Darunavir/cobicistat | 16 (5.2) | 10 (5.9) | 6 (4.4) |  | 0.558 |
| Lopinavir/ritonavir | 130 (42.6) | 75 (44.4) | 55 (40.4) |  | 0.489 |
| LMWH | 253 (82.9) | 144 (85.2) | 109 (80.1) |  | 0.243 |
| Therapeutic dose | 79 (25.9) | 43 (25.4) | 36 (26.5) |  | 0.839 |
| Prophylactic dose | 174 (57) | 101 (59.8) | 73 (53.7) |  | 0.286 |
| DOAC | 23 (7.5) | 13 (7.7) | 10 (7.4) |  | 0.911 |
| VKA | 8 (2.6) | 5 (3) | 3 (2.2) |  | 0.736 |
| No anticoagulation | 21 (6.9) | 7 (4.1) | 14 (10.3) | 3.57 (1.39-9.13 | 0.035 |
| **Endpoints** | | | | | |
| Stroke | 1 (0.3) | 0 | 1 (0.7) |  | 0.446 |
| Venous thromboembolism | 4 (1.3) | 3 (1.8) | 1 (0.7) |  | 0.631 |
| Major bleeding | 30 (9.8) | 14 (8.3) | 16 (11.8) |  | 0.31 |

aDBADL was considered if it was described in the medical history or for institutionalized patients. bRecent stroke was considered if it occurred in the last 6 months. cNote that 42 (24.8%) (No-exitus group) and 18 patients (13.2%) (Exitus group) did not have previous echocardiographic study. dConsidered if moderate or severe mitral stenosis. eAt admission. fMaximum value during admission. SD, standard deviation; OR, Odds ratio; CI, confidence interval; HBP, high blood pressure; DM, diabetes mellitus; CKD, chronic kidney disease; DBADL, dependency for basicactivities of daily living; PVD, peripheral vascular disease; ICU, intensive care unit; LMWH, low-molecular-weight heparin; DOAC, direct oral anticoagulant; VKA, vitamin K antagonist.

Table A.6. Multivariate analysis. Independent predicting factors of 6-month mortality in AF patients.

| Variable | Odds ratio | 95% CI | | P |
| --- | --- | --- | --- | --- |
| Lower | Upper |
| Age | 1.04 | 1.01 | 1.07 | 0.010 |
| DBADL | 2.17 | 1.27 | 3.69 | 0.005 |
| Male sex | 2.09 | 1.27 | 3.44 | 0.004 |
| CKD | 2.12 | 1.20 | 3.74 | 0.010 |

CI, confidence interval; CKD, chronic kidney disease; DBADL, dependency for basicactivities of daily living
